# Supplementary material for: Mucosal Infections and Invasive Potential of Nonencapsulated Streptococcus pneumoniae Are Enhanced by Oligopeptide Binding Proteins AliC and AliD
Source: PubMed Central journal article supplement (PMC5770551; doi:10.1128/mbio.02097-17), 2018-01-16
Supplement: mbo001183686sf2.pdf [file mbo001183686sf2.pdf]

**FIG S2**

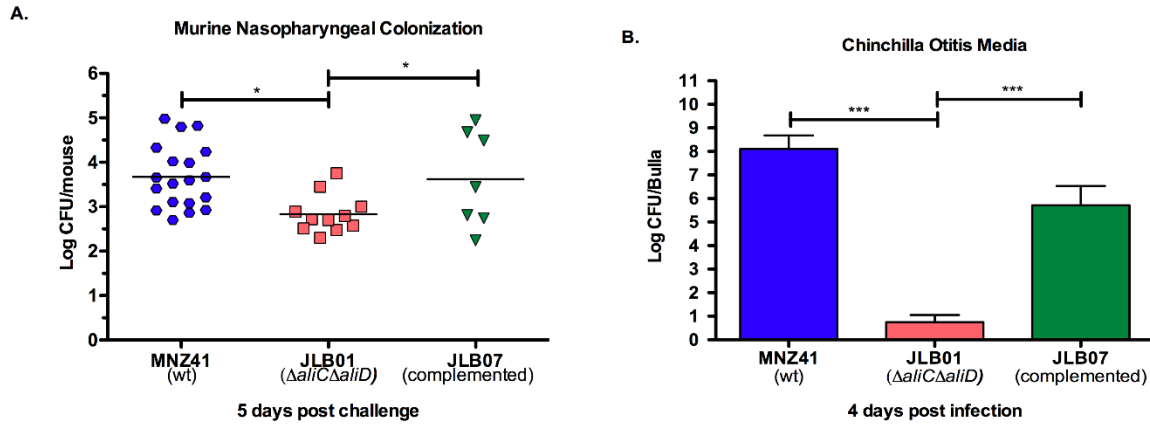

**FIG S2** In vivo murine nasopharyngeal colonization and chinchilla otitis media phenotypes are restored after genetic complementation. Recovered JLB07 CFU during murine colonization at 5 days post challenge (A) and chinchilla otitis media at 4 days post infection (B) were significantly increased similar to wt levels. Data represent at least two independent studies. Error bars represent standard error of the mean. (\* =  $p < 0.05$ , \*\*\* =  $p < 0.001$ )
